# Supplementary material for: Hexagonal boron nitride nanophotonics: a record-breaking material for the ultraviolet and visible spectral ranges
Source: Royal Society of Chemistry journal article supplement (doi:10.1039/d3mh00215b), 2023-01-01
Supplement: d3mh00215b1.pdf [file d3mh00215b1.pdf]

## Supplementary Information

# Hexagonal boron nitride nanophotonics: a record-breaking material for ultraviolet and visible spectral ranges

Grudin D.V.,<sup>a,b†</sup> Ermolaev G.A.,<sup>a,b†</sup> Baranov D.G.,<sup>b,c</sup> Toksumakov A.N.,<sup>b,c</sup> Voronin K.V.,<sup>b,c</sup> Slavich A.S.,<sup>b,c</sup>

Vyshnevyy A.A.,<sup>a,b</sup> Mazitov A.B.,<sup>d</sup> Kruglov I.A.,<sup>a,b</sup> Ghazaryan D.A.,<sup>b,c,e</sup> Arsenin A.V.,<sup>a,b,e</sup> Novoselov K.S.,<sup>f,g,h</sup> and

Volkov V.S.<sup>a\*</sup>

<sup>a</sup>Emerging Technologies Research Center, XPANCEO, Dubai Investment Park 1, Dubai, United Arab Emirates

<sup>b</sup>Center for Photonics and 2D Materials, Moscow Institute of Physics and Technology, Dolgoprudny 141700, Russia

<sup>c</sup>Moscow Center for Advanced Studies, Kulakova str. 20, Moscow, 123592, Russia

<sup>d</sup>Institute of Materials, École Polytechnique Fédérale de Lausanne, Lausanne, 1015, Switzerland

<sup>e</sup>Laboratory of Advanced Functional Materials, Yerevan State University, Yerevan, 0025, Armenia

<sup>f</sup>National Graphene Institute (NGI), University of Manchester, Manchester, M13 9PL, UK

<sup>g</sup>Department of Materials Science and Engineering, National University of Singapore, Singapore, 03-09 EA, Singapore

<sup>h</sup>Chongqing 2D Materials Institute, 400714, Chongqing, China

<sup>†</sup> These authors contributed equally.

<sup>\*</sup> Corresponding author.

## 22 **Supplementary Note 1: Ellipsometric spectra of hBN flake**

23 Supplementary Figure 1 shows experimental ellipsometric parameters for hBN flake investigated in  
24 the main text.

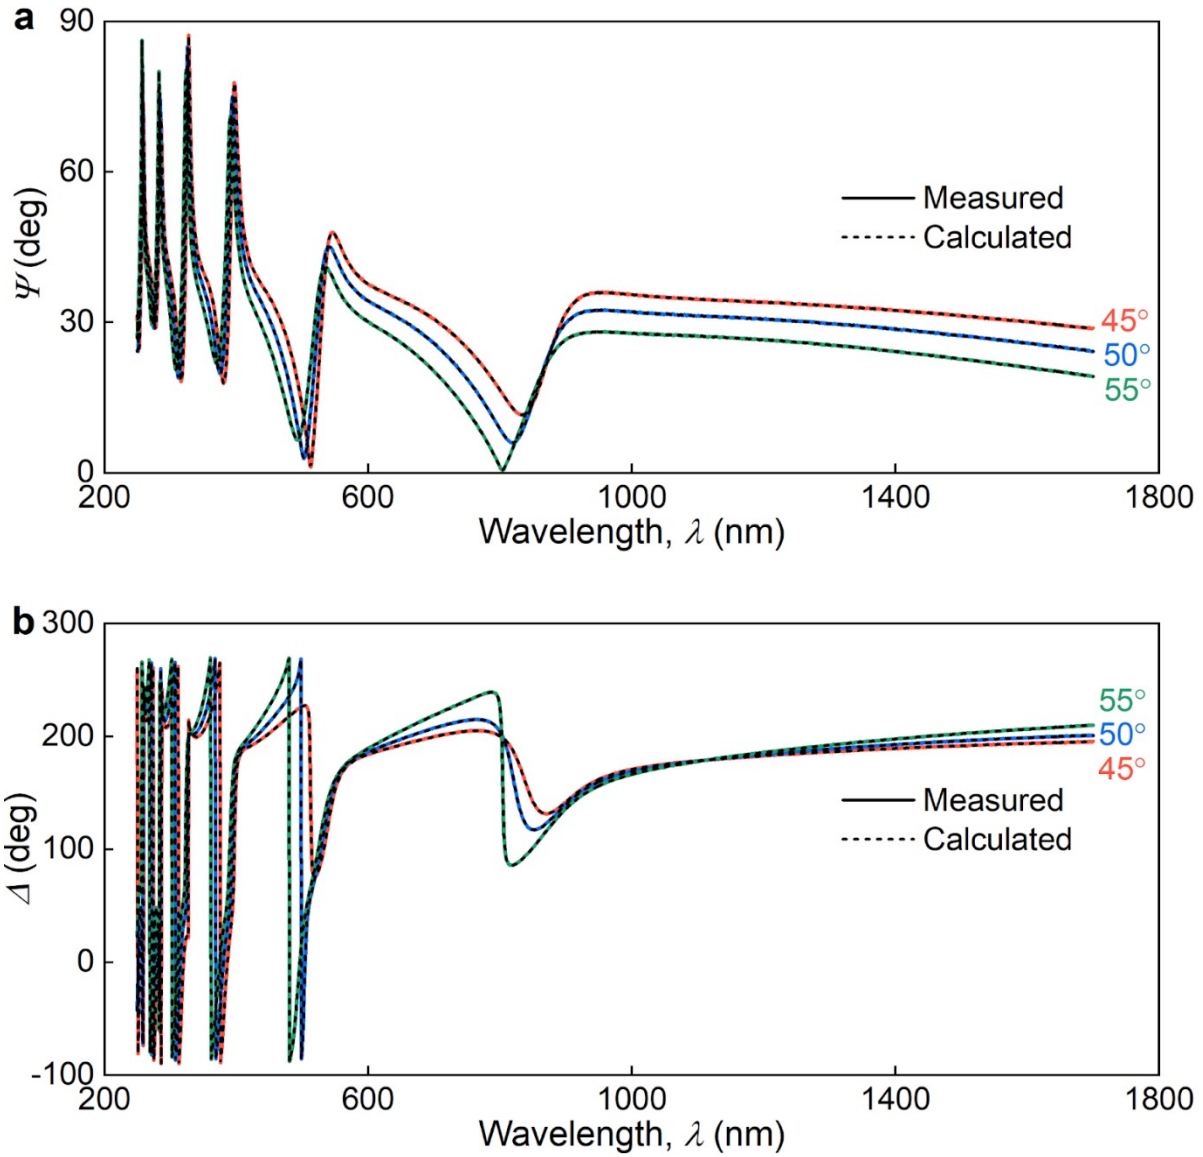

25

26 **Supplementary Figure 1.** Ellipsometry spectra of hBN. **a**  $\Psi$  and **b**  $\Delta$  at three incident angles.

## 27 **Supplementary Note 2: Near-field imaging of a planar waveguide mode within hBN flake**

28 To analyze the modes of a planar waveguide in an hBN flake, we used scattering scanning near-field  
29 optical microscopy. The installation diagram is shown in Figure 2. Scanning was carried out near the

30 edge of the sample; in this case, the amplitude and phase oscillations observed in the experiment are  
 31 a consequence of the interference of the signal of the mode excited at the probe and scattered at the  
 32 edge of the sample as seen in Figure 3. During measurements we aligned the sample to have  $k_{xy}$   
 33 perpendicular to the edge of the sample. The measurement results are shown in Figure 4a. To analyze  
 34 the effective mode index, we performed a complex Fourier transform of each row of the complex  
 35 amplitude-phase, and then averaged the obtained spectra, thereby obtaining the spectra in Figure 4c.  
 36 Two peaks in the Fourier spectra correspond to the background illumination and the edge-scattered  
 37 mode. The absence of peaks on the negative side indicates that there was no scattering at the edge on  
 38 the left side of the probe. The position of the peak after taking into account the shift associated with  
 39 the geometry of the setup and the sample (formula 1 main text) corresponds to the effective mode  
 40 index.

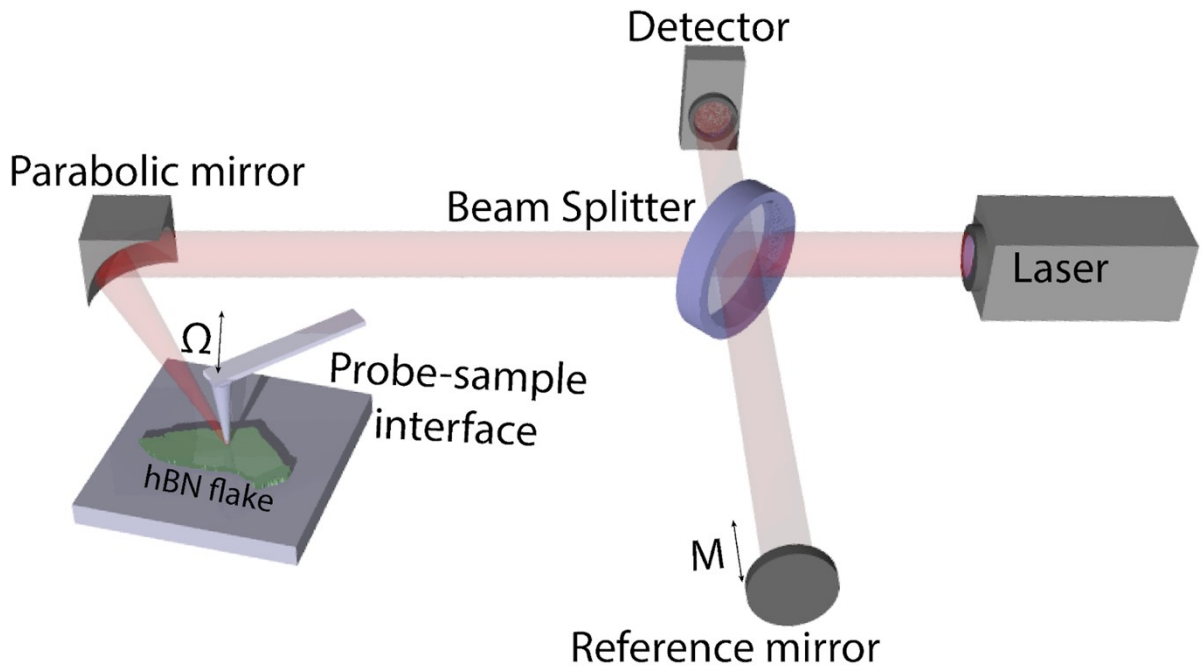

41

42 **Supplementary Figure 2.** Experimental scheme of the near field microscope. The same mirror is  
 43 used for focusing light on the edge of the tip and to collect near field signals.

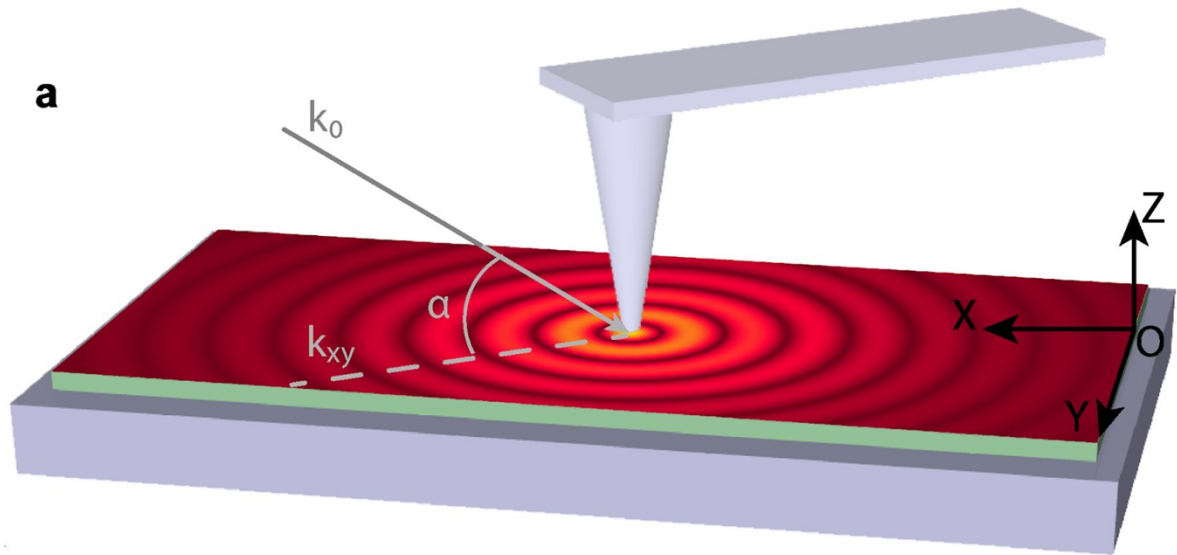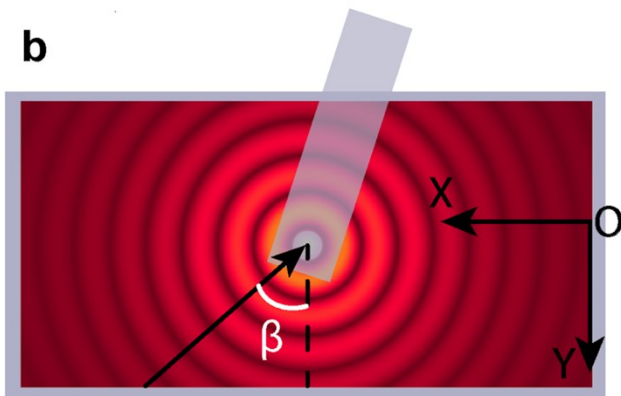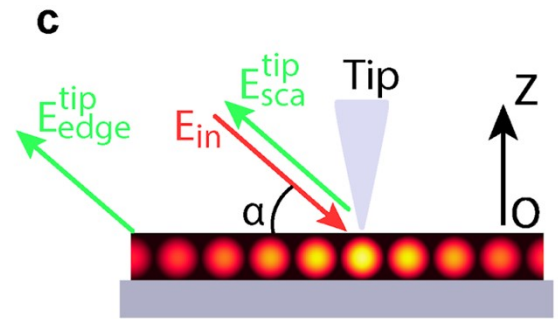

44

45 **Supplementary Figure 3.** Schematic of the near-field imaging principle. Phase difference between  
 46  $E_{\text{sca}}$  and  $E_{\text{edge}}$  gives the shift in observable frequency of oscillations.

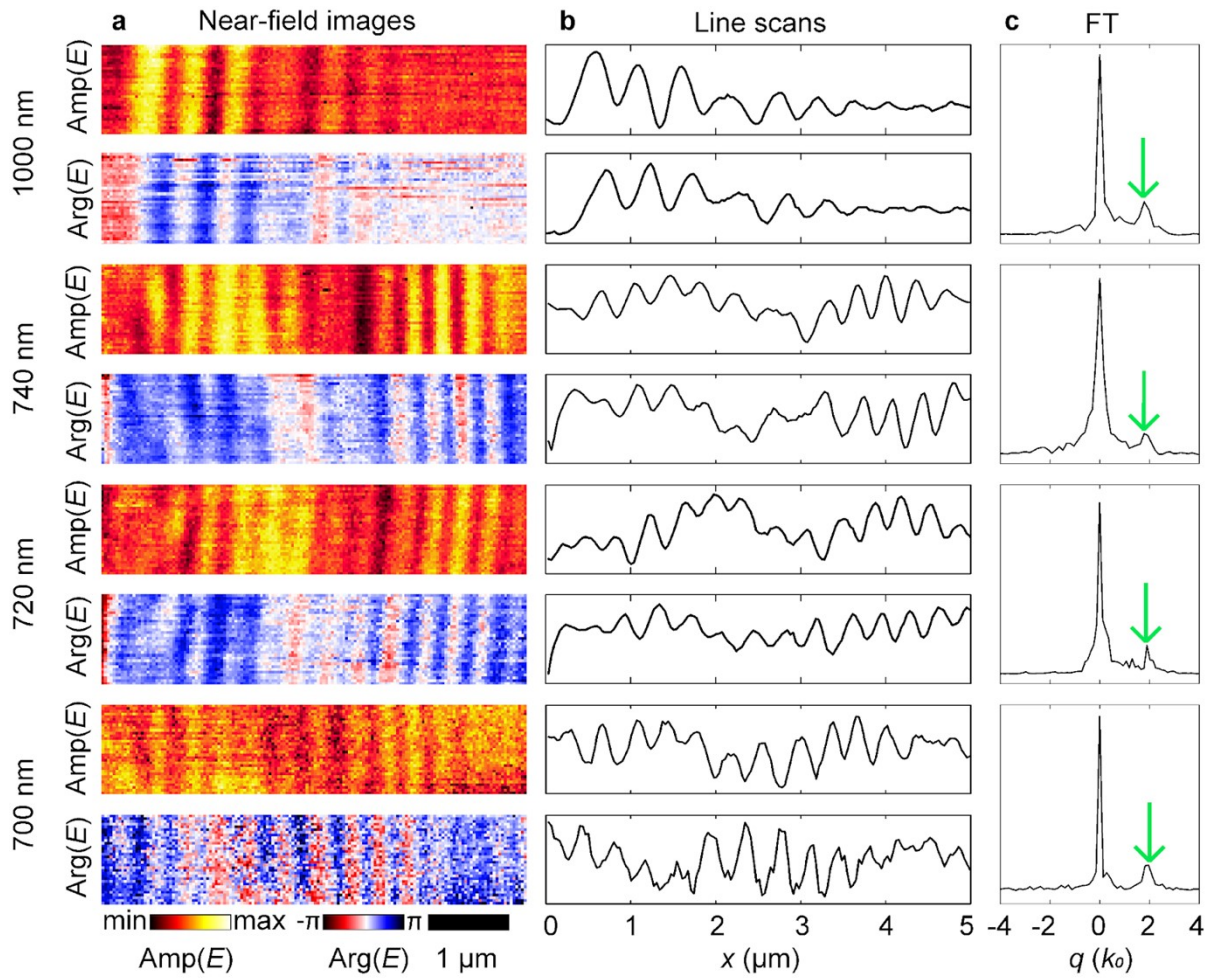

47

48 **Supplementary Figure 4. a.** Near-field measurements of hBN. Near-field images, real part  $\text{Re}(E)$   
 49 and phase  $\text{Arg}(E)$ . **b**  $x$ -line scans taken from panel a and averaged over  $1.1\ \mu\text{m}$  along the  $y$ -axis. **c**  
 50 Fourier transform (FT) amplitude of the complex near field signal in **b**. Green arrows mark the peak  
 51 associated with the waveguide mode.

52
